# Supplementary material
Source: Springer Nature journal article supplement (https://www.springermedizin.de/resource/supplementary/12885_2009_2090_MOESM10_ESM.pdf/9460502)
Supplement: MOESM10 [file 9460502]

**A**

Network 1 : BT474-upregulated - 2008-12-08 02:59 PM : BT474-upregulated.xls : BT474-upregulated - 2008-12-08 02:59 PM

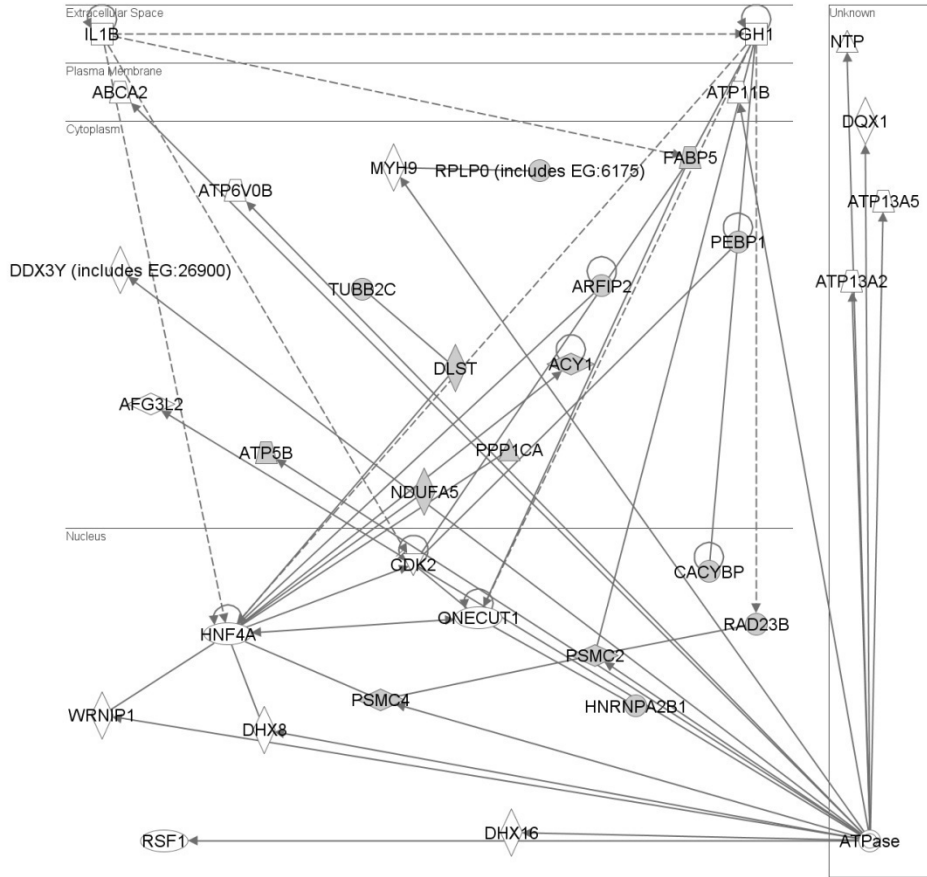

© 2000-2008 Ingenuity Systems, Inc. All rights reserved.

**B**

Network 2 : BT474-upregulated - 2008-12-08 02:59 PM : BT474-upregulated.xls : BT474-upregulated - 2008-12-08 02:59 PM

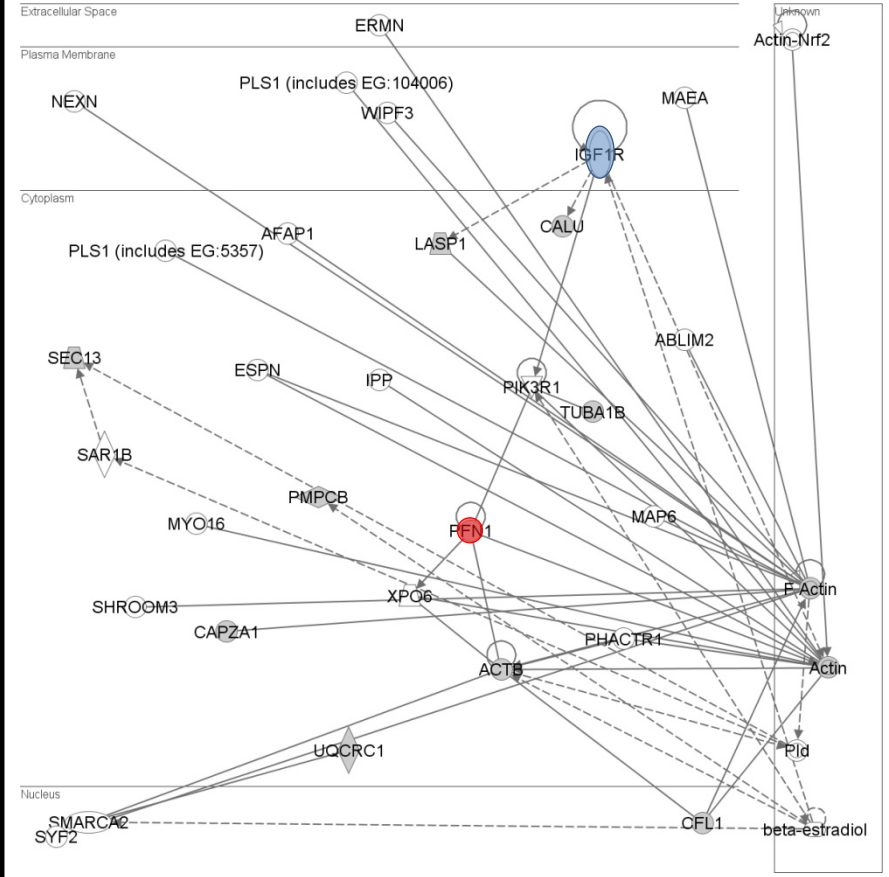

© 2000-2008 Ingenuity Systems, Inc. All rights reserved.
